# Supplementary material for: Multistimuli-responsive organogels based on hydrazide and azobenzene derivatives
Source: Royal Society of Chemistry journal article supplement (doi:10.1039/c6ra24886a), 2016-12-24
Supplement: c6ra24886a1.pdf [file c6ra24886a1.pdf]

## Supporting information

### Multistimuli-responsive organogels based on hydrazide and azobenzene derivatives

Table 1 Gelation properties of **E5**, **E6** and **E10** in various solvents

| Solvent           | E5 | E6    | E10      |
|-------------------|----|-------|----------|
| DMF               | S  | G (8) | G (11.5) |
| THF               | S  | S     | S        |
| DMSO              | S  | S     | S        |
| CHCl <sub>3</sub> | I  | I     | I        |

I: insoluble; G: stable gel formed at room temperature; S: soluble; Numbers in parentheses present the critical gel concentration (CGC, mg/mL).

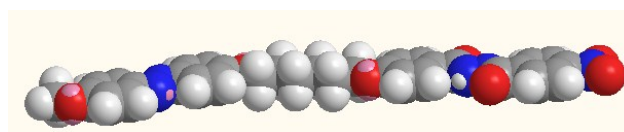

(a)

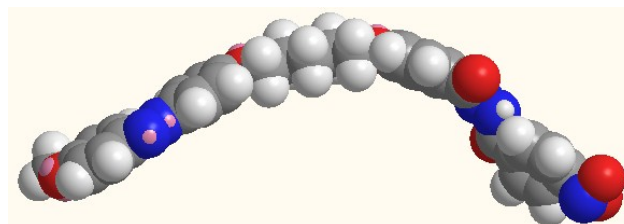

(b)

Fig. S1 The molecular shapes of: (a) **E6**, an even; (b) **E5**, an odd numbered central spacer in the all-*trans* conformation (calculated by MM2).

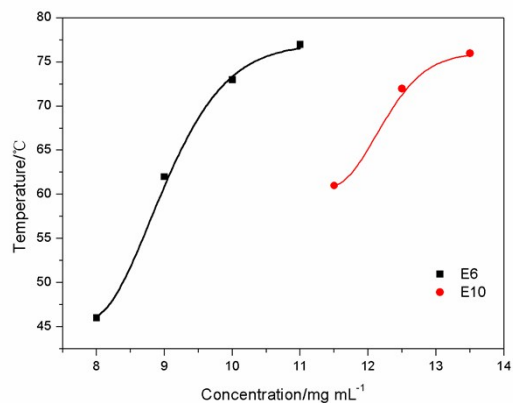

Fig.S2 Plots of  $T_{gel}$  versus the concentration of **E6** (■) and **E10** (●) in DMF.

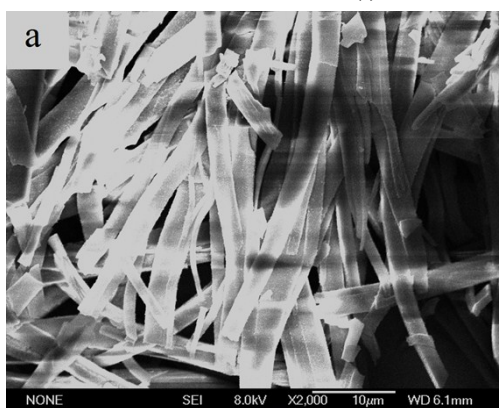

Fig. S3 SEM images of **E5** solution in DMF(25 mg/ml).

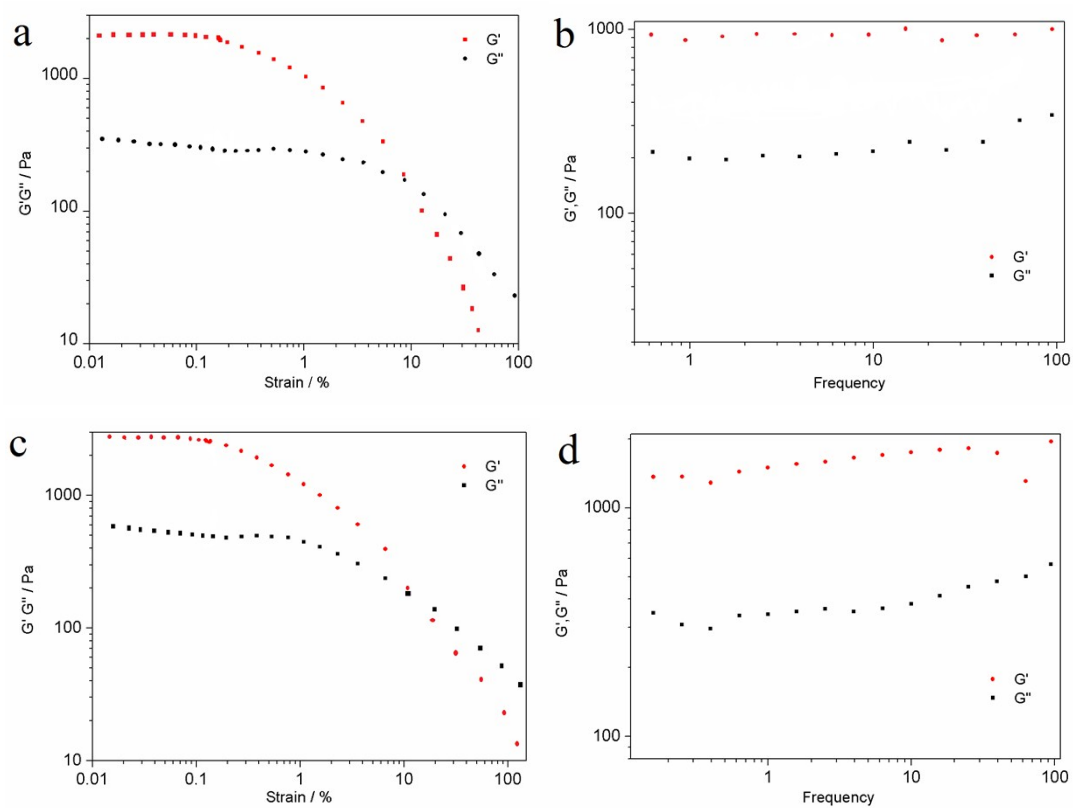

Fig. S4 (a) Amplitude dependencies and (b) Frequency dependency of storage modulus ( $G'$ ) and loss modulus ( $G''$ ) of **E6** gel in DMF (12mg/ml). (c) Amplitude dependencies and (d) Frequency dependency of storage modulus ( $G'$ ) and loss modulus ( $G''$ ) of **E10** gel in DMF (The frequency is 1 Hz and the strain is 0.1%, 12mg/ml).

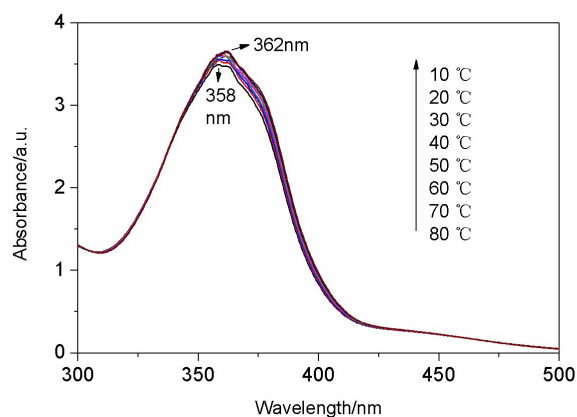

Fig. S5 Temperature-dependent UV-vis absorption spectra of **E6** solution ( $1 \times 10^{-3}$  mol/L) in DMF

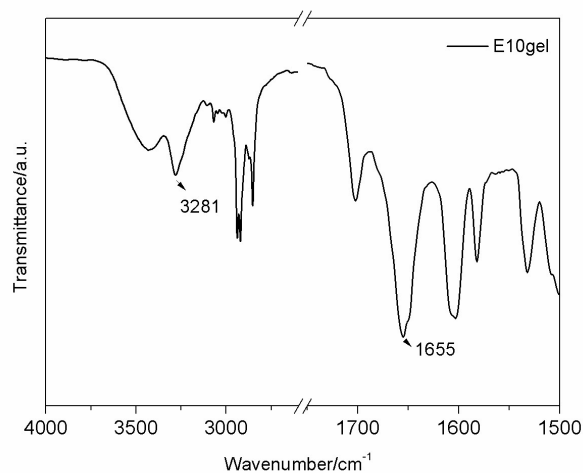

Fig. S6 FTIR spectra of **E10** xerogel (11mg/mL) in DMF.

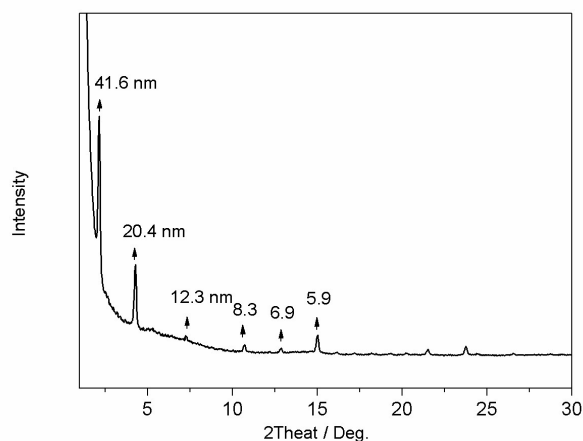

Fig. S7 X-Ray diffraction pattern of **E10** xerogel (11.5mg/ml) in DMF.

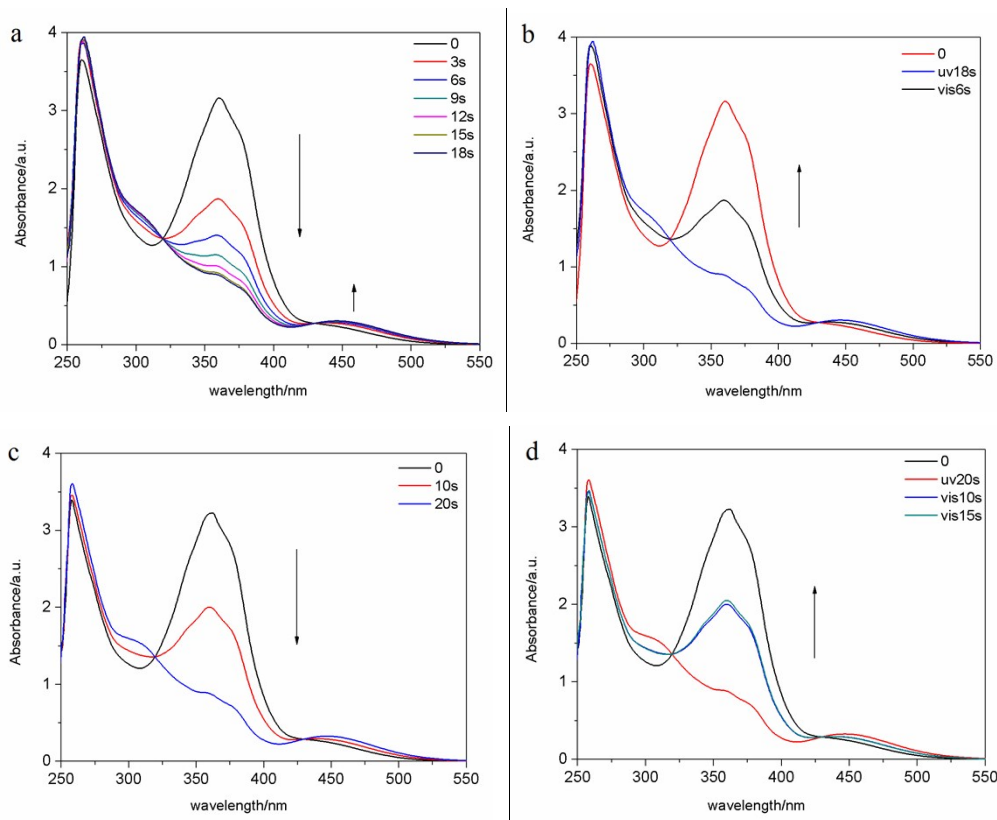

Fig. S8 UV-vis spectra of solution in DMF ( $1 \times 10^{-3}$  mol/L) (a) **E5** under irradiation at UV light for 0-18s; (b) **E5** under visible light irradiation for 6s; (c) **E10** under irradiation at UV light for 20s; (d) **E10** under visible light irradiation for 15s.

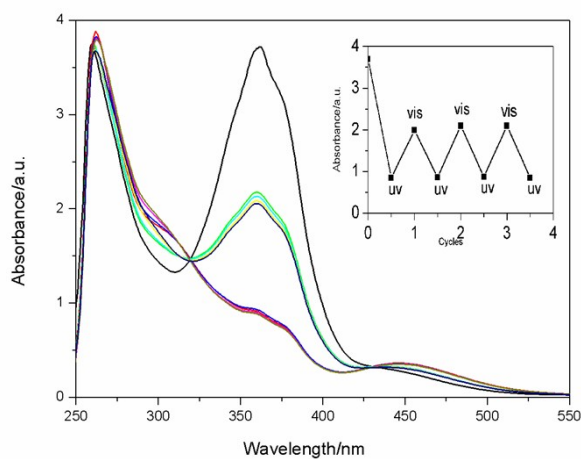

Fig. S9 UV-vis spectra of **E6** solution in DMF ( $1 \times 10^{-3}$  mol/L) are irradiated multiple times by UV and vis light.

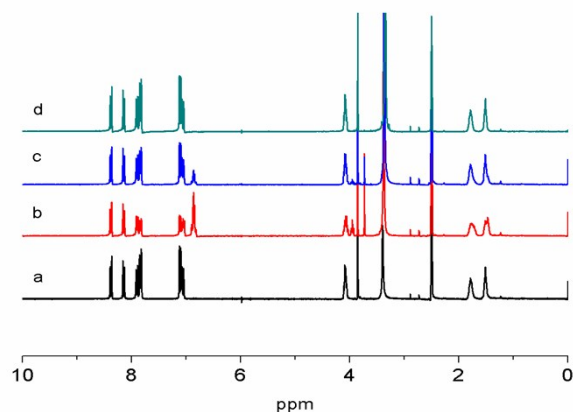

Fig. S10 Partial  $^1\text{H}$ -NMR spectrum of **E6** upon alternating irradiation (a) none; (b) UV light for 1.5h ; (c) vis light for 1.5h ; (d) heat in  $\text{DMSO-d}_6(1 \times 10^{-2} \text{mol/L})$ .

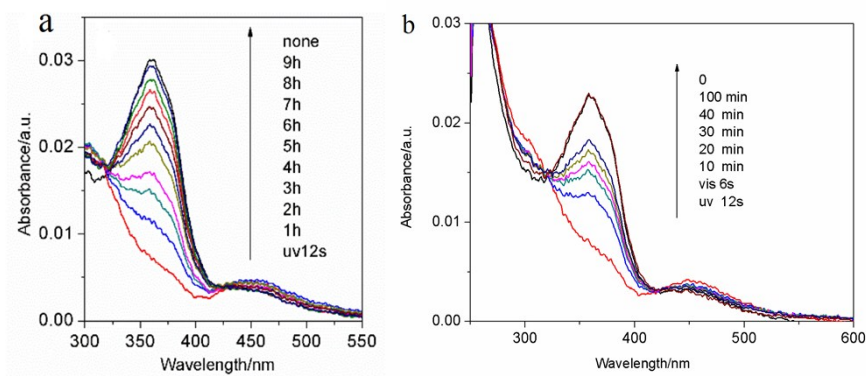

Fig. S11 The *trans*-azobenzene of **E<sub>6</sub>** ( $1 \times 10^{-5} \text{mol/L}$ ) be recovered by place in darkness (a) after UV light irradiation and then placed in darkness for 9h; (b) after UV light irradiation for 12s and vis light irradiation 6s, and then placed in darkness for 100min.

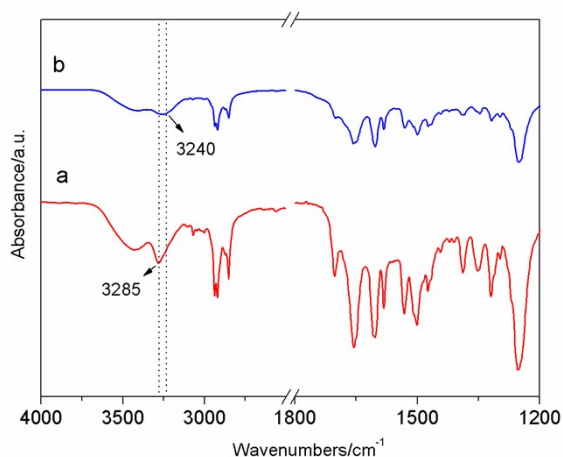

Fig. S12 FTIR spectra of (a) xerogel of **E10** gel in DMF; (b) the precipitate developed from the gel in DMF under the irradiation of 365 nm UV light.

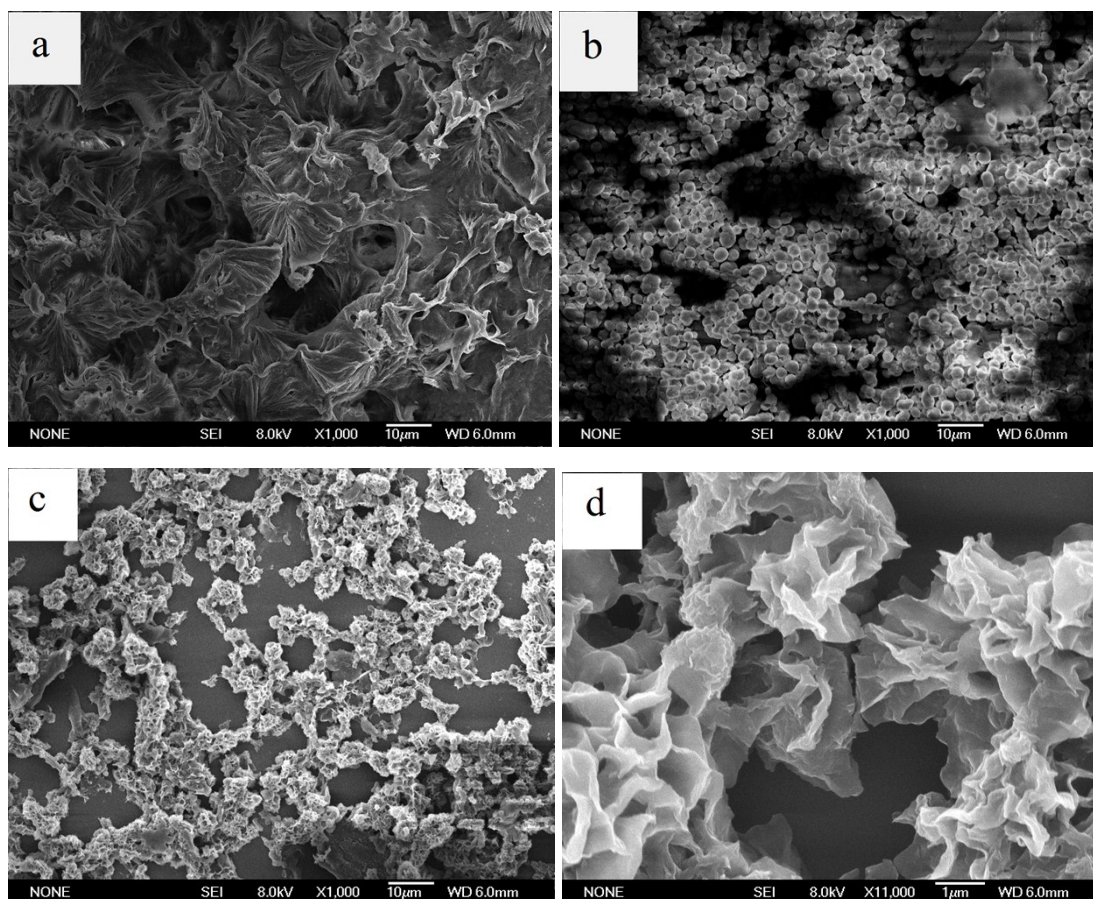

Fig. S13 SEM images of **E10**: (a) the precipitate from organogel in DMF under irradiation by 365 nm UV light for 9h ; (b) the solution of organogel in DMF under irradiation by 365 nm UV light for 9h. (c) (d) the solution after visible light irradiation. (11.5 mg/mL)

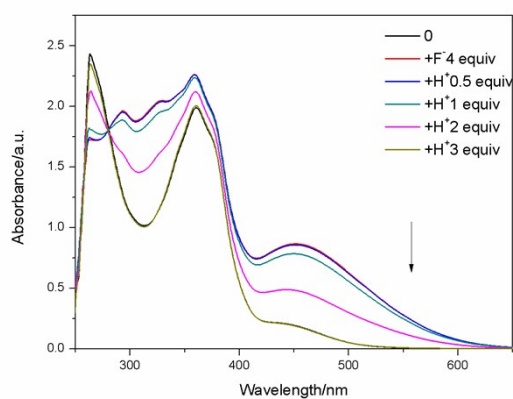

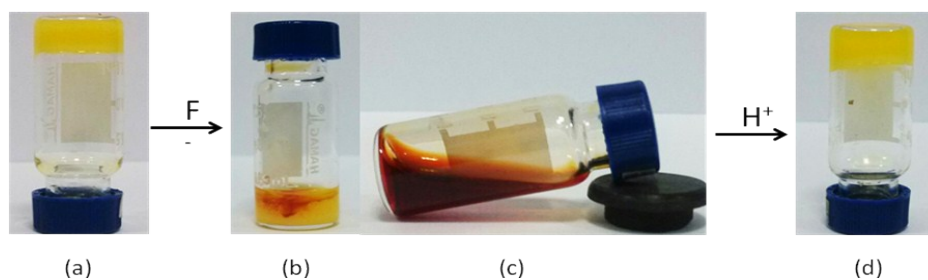

Fig. S14 (a) **E6** organogel (8mg/ml, in DMF); (b) immediately after addition of solid TBAF (10equiv); (c) after 1 min; (d) addition of  $H^+$ .

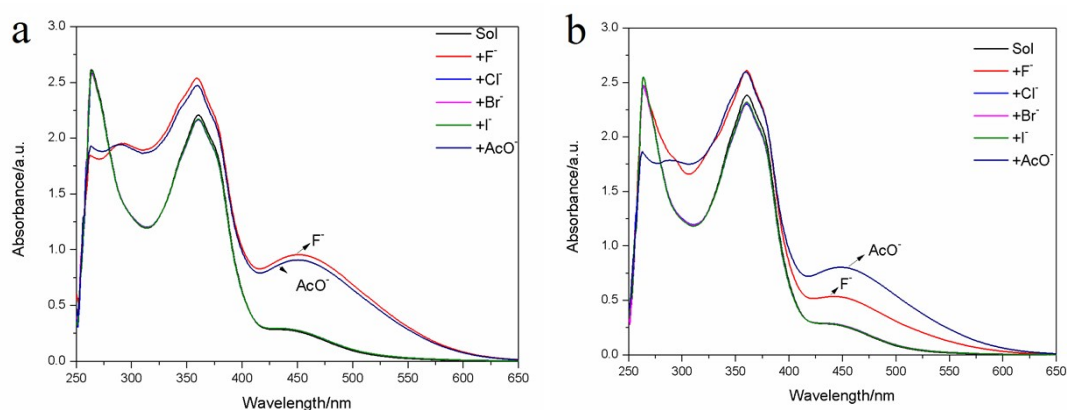

Fig. S15 UV-vis spectra of (a) **E5**; (b) **E10** ( $1 \times 10^{-4}$  mol/L) in DMF upon addition of 10 equiv of various anions ( $F^-$ ,  $Cl^-$ ,  $Br^-$ ,  $I^-$ ,  $AcO^-$ ).

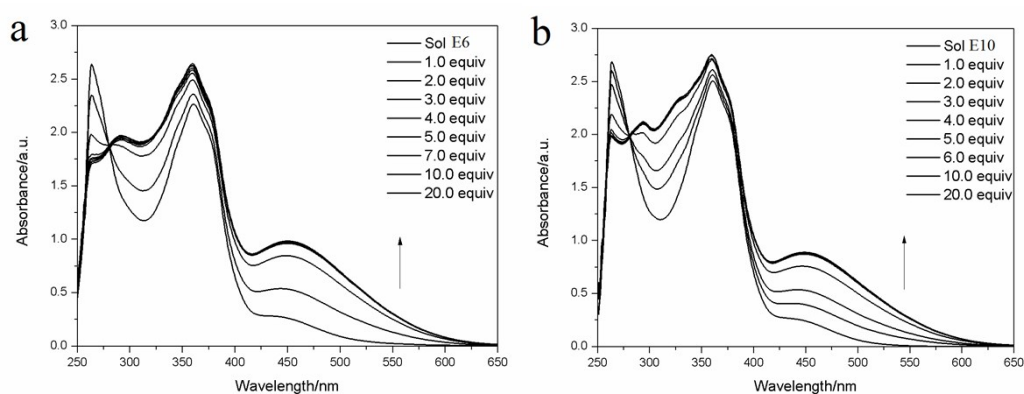

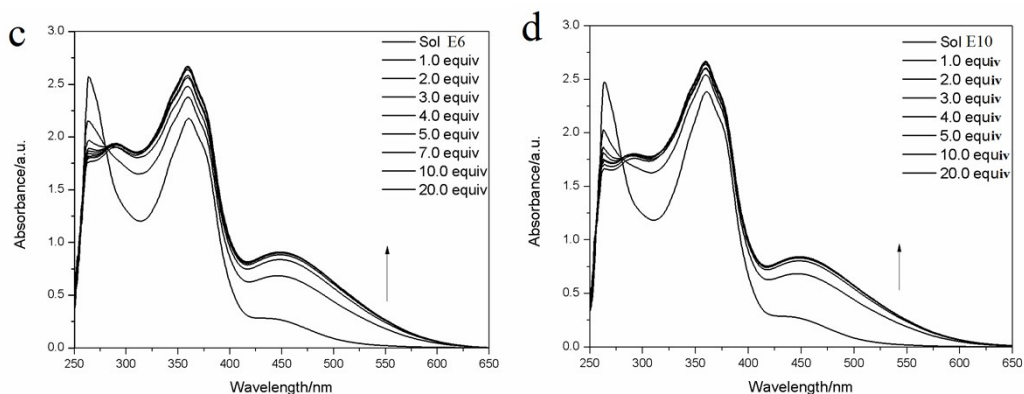

Fig. S16 UV-vis absorption spectra of **E6** and **E10** solution in the presence of  $F^-$  (a, b) and  $AcO^-$  (c, d) in DMF ( $1 \times 10^{-4} \text{ mol/L}$ ).

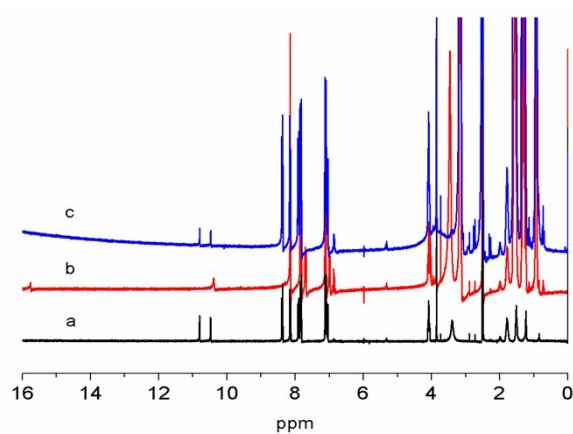

Fig. S17 Partial  $^1H$ -NMR spectra of **E6** in the addition of (a) none; (b) 5 equiv  $F^-$ ; (c) 10 equiv  $CF_3COOH$  in  $DMSO-d_6$  ( $1 \times 10^{-2} \text{ M}$ ).

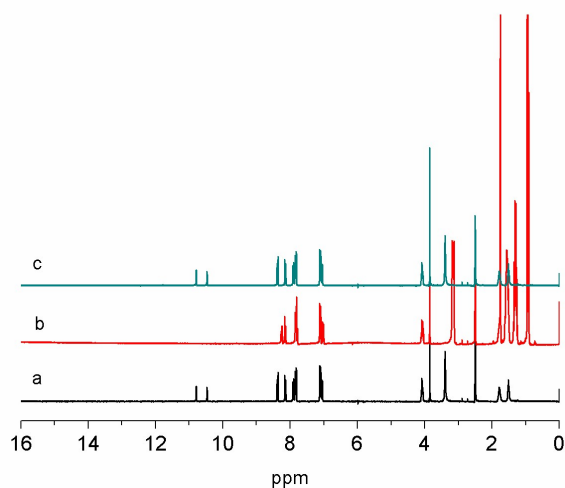

Fig. S18 Partial  $^1H$ -NMR spectra of **E6** in the addition of (a) none; (b) 3 equiv  $AcO^-$ ; (c) 10 equiv  $CF_3COOH$  in  $DMSO-d_6$  ( $1 \times 10^{-2} \text{ mol/L}$ ).



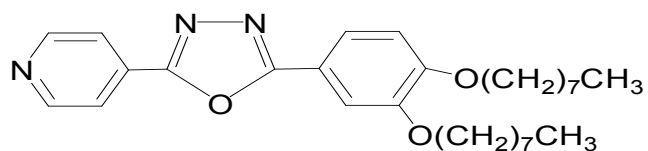

Fig. S19. Molecular structure of compound **4-poxd-B8**.

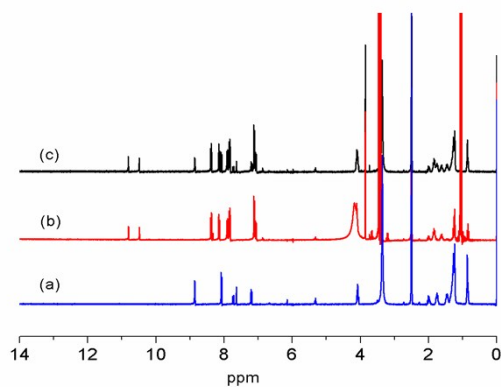

Fig. S20 Partial  $^1\text{H-NMR}$  spectra of (a) **4-poxd-B8**, (b) **E5**, (c) two-components (**4-poxd-B8** : **E5**=1:1) in  $\text{DMSO-}d_6$  ( $3 \times 10^{-3} \text{ mol/L}$ ).

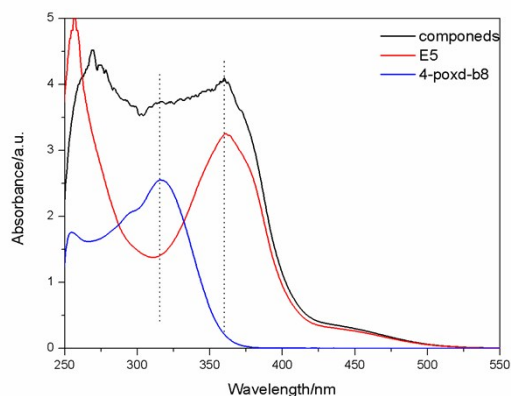

Fig. S21 UV-vis absorption spectra of **4-poxd-B8**, **E5** and two-components (**4-poxd-B8** : **E5**=1:1) in  $\text{DMSO}$  ( $1 \times 10^{-4} \text{ mol/L}$ ).

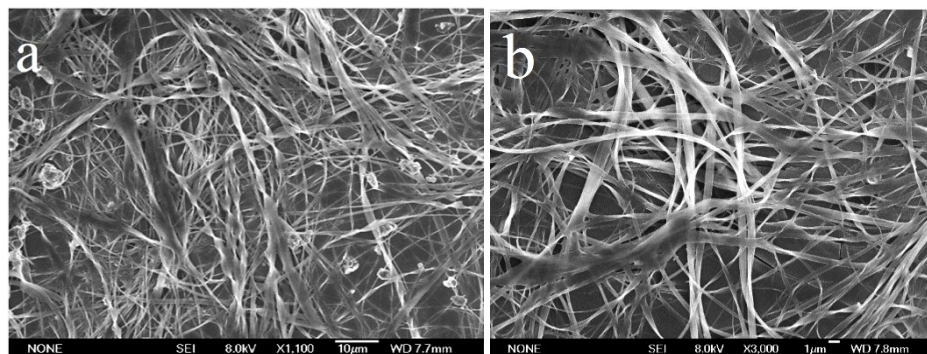

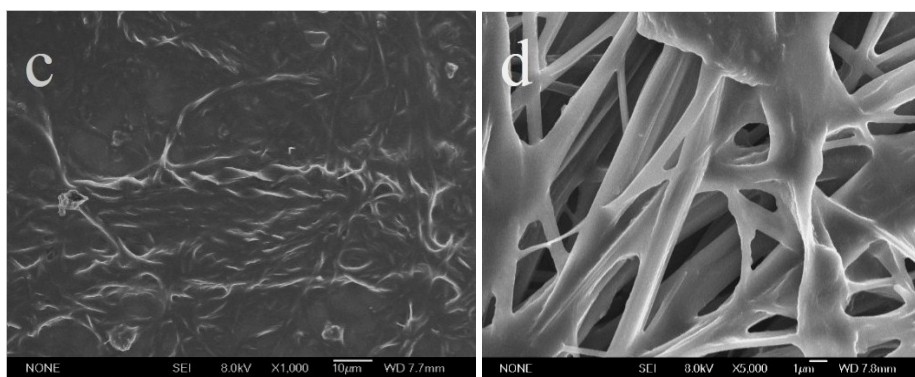

Fig. S22 SEM images of (a) **4-poxd-B8** xerogels in DMSO (5mg/ml); (b) two-components xerogels in DMSO (1:1); (c) two-components in the addition of 4 equiv  $F^-$ ; (d) two-components of addition 4 equiv  $CF_3COOH$  under (c).

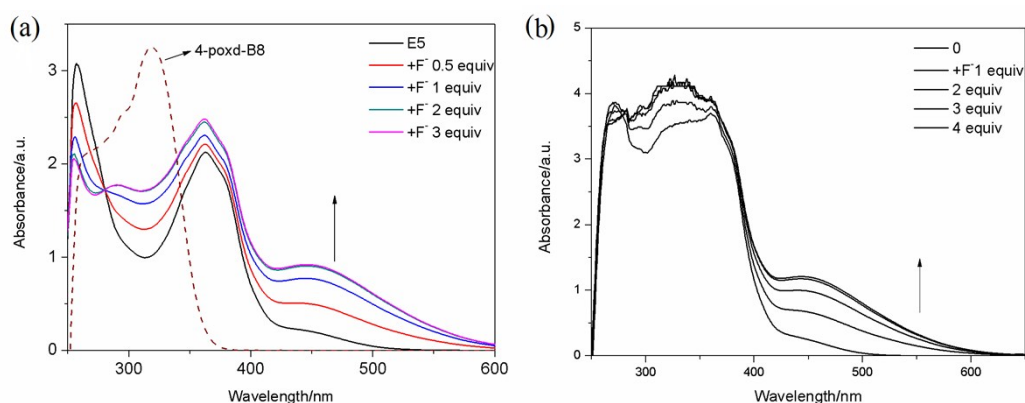

Fig. S23 UV-vis absorption spectra of (a) **4-poxd-B8** and **E5** solution in the DMSO ( $1 \times 10^{-4}$  mol/L) in the presence of 0-3 equiv  $F^-$ ; (b) two-components (**4-poxd-B8** : **E5=1:1**) solution in the DMSO ( $1 \times 10^{-4}$  mol/L, 1:1) in the presence of 0-4 equiv  $F^-$ .

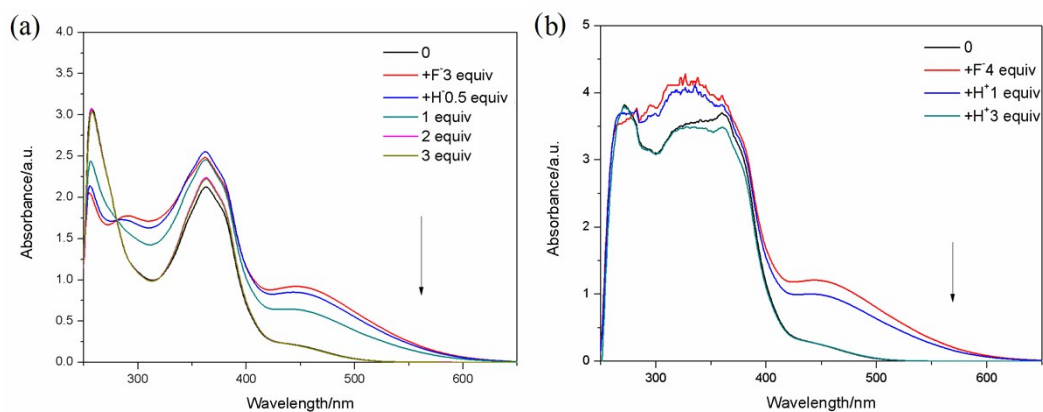

Fig. S24 UV-vis absorption spectra of (a) **E5** solution treated with 3equiv  $F^-$ , then added 0.5-3 equiv  $CF_3COOH$ ; (b) two-components (**4-poxd-B8** : **E5=1:1**) solution in the DMSO ( $1 \times 10^{-4}$  mol/L, 1:1) in the presence of 4 equiv  $F^-$ , then added 1-3 equiv

CF<sub>3</sub>COOH.

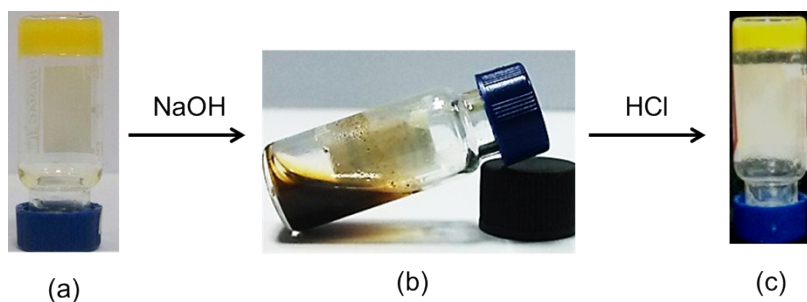

Fig. S25 (a) Organogel **E6** (8mg/ml, in DMF); (b) after addition of solid NaOH (20equiv) for 6h; (c) addition of HCl (20 equiv).

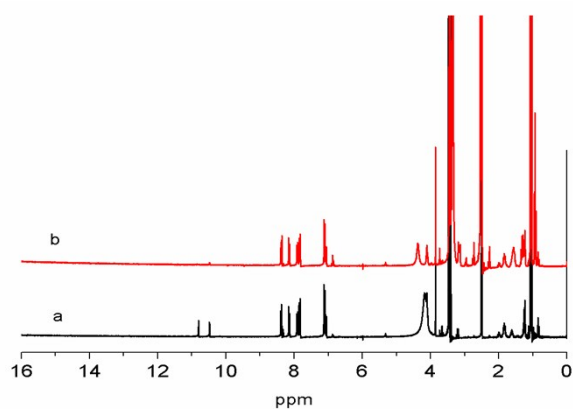

Fig. S26 Partial <sup>1</sup>H-NMR spectra of (a) **E5**; (b) addition 20 equiv NaOH.

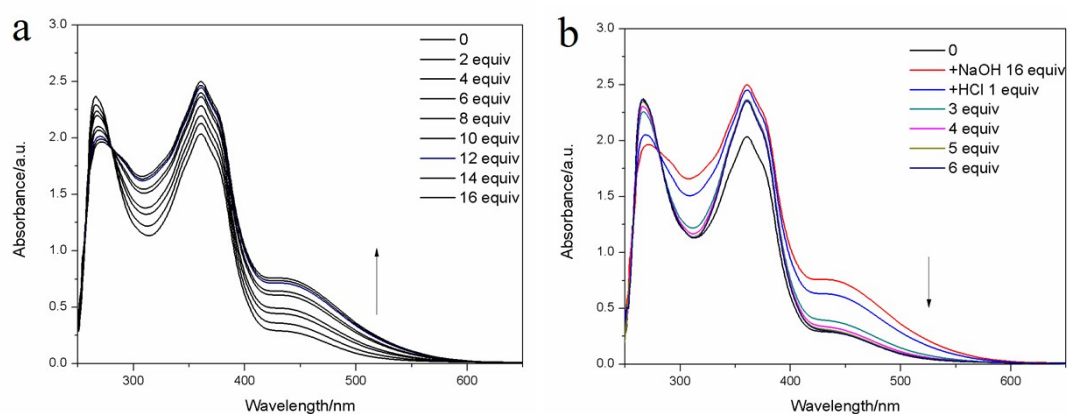

Fig. S27 UV-vis absorption spectra of E10 in the presence of (a) NaOH (0-16equiv.); (b) HCl in DMF ( $1 \times 10^{-4}$  mol/L).
